# Supplementary material for: Effect of hydrodynamic inter-particle interaction on the orbital motion of dielectric nanoparticles driven by an optical vortex
Source: Royal Society of Chemistry journal article supplement (doi:10.1039/c9nr10591c), 2020-01-01
Supplement: c9nr10591c3.pdf [file c9nr10591c3.pdf]

# Electronic Supplementary Information: Effect of hydrodynamic inter-particle interaction on orbital motion of dielectric nanoparticles driven by an optical vortex

Tetsuro Tsuji,<sup>\*,†,‡</sup> Ryoji Nakatsuka,<sup>†</sup> Kichitaro Nakajima,<sup>†</sup> Kentaro Doi,<sup>†</sup> and  
Satoyuki Kawano<sup>\*,†</sup>

<sup>†</sup>*Graduate School of Engineering Science, Osaka University, Toyonaka 560-8531, Japan*

<sup>‡</sup>*Present address: Graduate School of Informatics, Kyoto University, Kyoto 606-8501,  
Japan*

E-mail: Correspondingauthor:tsuji.tetsuro.7x@kyoto-u.ac.jp;

Correspondingauthor:kawano@me.es.osaka-u.ac.jp

### Movie S1 (movieS1.avi)

Orbital motion of the particle with the diameter  $d_p = 1 \mu\text{m}$  for the number of particles in the orbit  $N = 8, 10,$  and  $12$ . The laser power  $P_{\text{laser}} = 541 \text{ mW}$  and the azimuthal mode  $m = 1$  are used. As a consequence of hydrodynamic inter-particle interaction, the orbital speed is faster for larger  $N$ . The corresponding data are shown in Fig. 10(a). The radius of the orbital motion is about  $2.1 \mu\text{m}$ .

### Movie S2 (movieS2.avi)

The experiment without microscale confinement. The nanoparticle of the diameter  $d_p = 0.2 \mu\text{m}$  with  $5 \times 10^{-4} \text{ vol}\%$  concentration is put in a cylindrical chamber with the diameter  $5 \text{ mm}$  and height  $1 \text{ mm}$ . The optical vortex beam irradiation at the center of the observation region starts at  $t = 1.2 \text{ s}$ , where the laser focus is placed at the bottom of the chamber. The azimuthal mode is set to be  $m = 1$  and  $P_{\text{laser}}$  is set to be  $400 \text{ mW}$ . After the onset of the laser irradiation, the particle starts to be de-focused, that is, the particle is pushed away in the  $z$  direction, which is the direction of the beam propagation. This movie demonstrates the importance of the microscale confinement for the stable orbital motion of dielectric nanoparticles. Note that the microscale confinement is also useful to avoid the onset of thermal convection, which may arise because of the temperature increase of the solution due to laser absorption, namely, a photothermal effect.

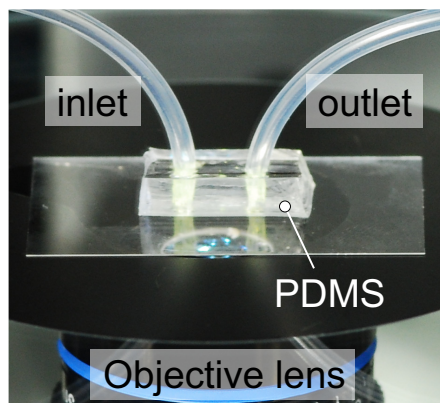

Fig. S1: Photograph of the microfluidic device on the microscope stage in Fig. 2.
